# Supplementary material for: Novel bisimidazolium pincers as low loading ligands for in situ palladium-catalyzed Suzuki–Miyaura reaction in the ambient atmosphere
Source: Royal Society of Chemistry journal article supplement (doi:10.1039/c2cc36375e), 2012-12-17

## ***Supporting Information***

### **Novel Bisimidazolium Pincers as Low Loading Ligands for *in situ* Palladium-Catalyzed Suzuki-Miyaura Reaction in Ambient Atmosphere**

*Chao Gao, Hongjun Zhou, Siping Wei, Yinsong Zhao, Jingsong You and Ge Gao\**

*Key Laboratory of Green Chemistry and Technology of Ministry of Education, College of  
Chemistry, and State Key Laboratory of Biotherapy, West China Medical School,  
Sichuan University, 29 Wangjiang Road, Chengdu 610064, PR China*

*Fax: 86-28-85412203; E-mail: gg2b@scu.ed.cn*

## Table of contents

|                                                                                                                       |            |
|-----------------------------------------------------------------------------------------------------------------------|------------|
| <b>I. General Remarks.....</b>                                                                                        | <b>S3</b>  |
| <b>II. General Procedure for the Synthesis of the Bisimidazolium Ligands.....</b>                                     | <b>S3</b>  |
| <b>III. Procedures and Experimental Data for the Described Ligands.....</b>                                           | <b>S4</b>  |
| <b>IV. Crystal Growth and X-ray Crystallographic Data of <b>3a</b> (PF<sub>6</sub><sup>-</sup>) and <b>4</b>.....</b> | <b>S8</b>  |
| <b>V. Synthesis and Characterization of the Pd(L<sub>3a</sub>)Cl Complex.....</b>                                     | <b>S9</b>  |
| <b>VI. General Procedure for the Suzuki–Miyaura Coupling Reaction.....</b>                                            | <b>S9</b>  |
| <b>VII. Optimization of the Suzuki–Miyaura Coupling Reaction.....</b>                                                 | <b>S10</b> |
| <b>VIII. Analytical Data of the Coupling Products.....</b>                                                            | <b>S10</b> |
| <b>IX. References.....</b>                                                                                            | <b>S13</b> |
| <b>X. Copies of <sup>1</sup>H and <sup>13</sup>C NMR spectra.....</b>                                                 | <b>S13</b> |

## I. General Remarks

Unless otherwise noted, all reagents were obtained from commercial suppliers and used without further purification. Pd(OAc)<sub>2</sub> was purchased from Shanxi Kai Da Chemical Engineering (China) CO., Ltd. Cyanuric chloride was purchased from AstaTech (Chengdu) Biopharm CO., Ltd, and recrystallized twice by petroleum ether before use. Acetonitrile was dried by refluxing for at least 6 hours with CaH<sub>2</sub>, then distilled and stored under N<sub>2</sub>. *N*-Substituted imidazoles **2a-2g**<sup>1</sup> and ligand **3b**<sup>2</sup> were synthesized according to published procedures. The test tube for Suzuki reaction must be soaked by HNO<sub>3</sub> for at least 48 hours prior to use. Pd(OAc)<sub>2</sub> and bisimidazolium ligands were prepared to use as the 5 × 10<sup>-4</sup> M stock solutions in acetonitrile and methanol, respectively.

NMR spectra were obtained on a Bruker AMX-400 or a Varian INOVA 400 MHz spectrometer. The <sup>1</sup>H NMR (400 MHz) chemical shifts were measured relative to CDCl<sub>3</sub> or DMSO-*d*<sub>6</sub> as the internal reference (CDCl<sub>3</sub>: δ = 7.26 ppm; DMSO-*d*<sub>6</sub>: δ = 2.50 ppm). The <sup>13</sup>C NMR (100 MHz) chemical shifts were given using CDCl<sub>3</sub> or DMSO-*d*<sub>6</sub> as the internal standard (CDCl<sub>3</sub>: δ = 77.16 ppm; DMSO-*d*<sub>6</sub>: δ = 39.52 ppm). High-resolution mass spectra (HRMS) were obtained with a Waters-Q-TOF Premier (ESI). Elemental analysis was measured using a Euro EA-3000 elemental analyzer. Melting points were determined with XRC-1 instrument and are uncorrected.

X-Ray single-crystal diffraction data were collected on an Oxford CrysAlis CCD diffractometer for **3a** (PF<sub>6</sub><sup>-</sup>) and Xcalibur Eos diffractometer for **4**, respectively. The crystallographic data are summarized in Table S1.

## II. General Procedure for the Synthesis of the Bisimidazolium Ligands

A flame-dried Schlenk test tube with a magnetic stirring bar was charged with cyanuric chloride (0.184 g, 1.0 mmol) in dry acetonitrile under N<sub>2</sub> atmosphere. A solution of the *N*-substituted imidazole (2.2 mmol) in dry acetonitrile was added dropwise at room temperature within 30 minutes. After the suspension was heated at 110 °C for an indicated time, the reaction mixture was then cooled down to room temperature and filtered. The crude product was purified by column chromatography on silica gel to afford the pure product.

For **3g**, *n*-butyl imidazole (0.273 g, 2.2 mmol) in dry acetonitrile was added dropwise to a solution of cyanuric chloride (0.184 g, 1.0 mmol) in dry acetonitrile under N<sub>2</sub> atmosphere at 0 °C within 10

minutes. The suspension was reacted at 0 °C for further 20 minutes. Then the white precipitate was quickly filtered, washed with cold acetonitrile, and dried in vacuo to afford pure **3g**. **3g** must be stored under nitrogen in a refrigerator.

### III. Procedures and Experimental Data for the Described Ligands

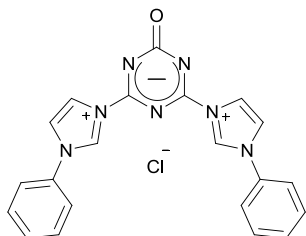

#### 2-Oxo-4,6-bis(1-phenyl-1H-imidazol-3-ium-3-yl)-2H-1,3,5-triazin-5-ide chloride (**3a**)

Cyanuric chloride (0.184 g, 1.0 mmol) and 1-phenyl-1H-imidazole **2a** (0.317 g, 2.2 mmol) in acetonitrile were heated at 110 °C for 2.5 h. The pure **3a** was obtained as a white solid (0.296 g, 71% yield) after chromatography on silica gel (CH<sub>2</sub>Cl<sub>2</sub>/MeOH = 5/1, v/v). mp >250 °C. <sup>1</sup>H NMR (400 MHz, DMSO-*d*<sub>6</sub>): δ 10.97 (s, 2H), 8.84 (s, 2H), 8.58 (s, 2H), 8.03 (d, *J* = 7.6 Hz, 4H), 7.72-7.64 (m, 6H). <sup>13</sup>C NMR (100 MHz, DMSO-*d*<sub>6</sub>): δ 165.4, 159.9, 135.2, 134.7, 130.5, 130.2, 122.8, 122.7, 119.7. HRMS-ESI [M-Cl]<sup>+</sup> calcd for C<sub>21</sub>H<sub>16</sub>N<sub>7</sub>O, 382.1411; found, 382.1412. Elemental analysis calcd (%) for C<sub>21</sub>H<sub>16</sub>ClN<sub>7</sub>O 2.7CH<sub>2</sub>Cl<sub>2</sub> 0.4CH<sub>3</sub>CN: C, 44.34; H, 3.43; N, 15.62. Found: C, 44.22; H, 3.45; N, 15.76.

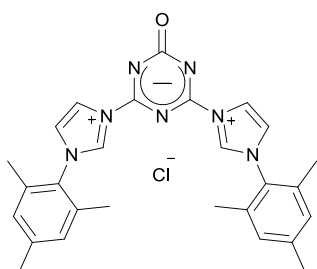

#### 2-Oxo-4,6-bis(1-mesityl-1H-imidazol-3-ium-3-yl)-2H-1,3,5-triazin-5-ide chloride (**3b**)

Cyanuric chloride (0.184 g, 1.0 mmol) and 1-mesityl-1H-imidazole **2b** (0.409 g, 2.2 mmol) in acetonitrile were heated at 110 °C for 2.5 h. The pure **3b** was obtained as a white solid (0.341 g, 68% yield) after chromatography on silica gel (CH<sub>2</sub>Cl<sub>2</sub>/MeOH = 10/1, v/v). mp >250 °C. <sup>1</sup>H NMR (400 MHz, DMSO-*d*<sub>6</sub>): δ 10.57 (s, 2H), 8.84 (s, 2H), 8.19 (s, 2H), 7.18 (s, 4H), 2.34 (s, 6 H), 2.10 (s, 12H). <sup>13</sup>C NMR (100 MHz, DMSO-*d*<sub>6</sub>): δ 165.3, 159.8, 140.6, 137.5, 134.2, 131.1, 129.3, 125.1, 119.7, 20.6, 17.0. HRMS-ESI [M-Cl]<sup>+</sup> calcd for C<sub>27</sub>H<sub>28</sub>N<sub>7</sub>O, 466.2350; found, 466.2353. Elemental analysis

calcd (%) for  $C_{27}H_{28}ClN_7O \cdot 0.3CH_2Cl_2 \cdot 0.5H_2O$ : C, 61.12; H, 5.56; N, 18.28. Found: C, 60.95; H, 5.75; N, 18.05.

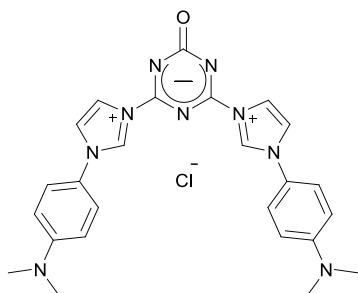

**2-Oxo-4,6-bis[1-[4-(dimethylamino)phenyl]-1*H*-imidazol-3-ium-3-yl]-2*H*-1,3,5-triazin-5-ide chloride (3c)**

Cyanuric chloride (0.184 g, 1.0 mmol) and 4-(1*H*-imidazol-1-yl)-*N,N*-dimethylaniline **2c** (0.412 g, 2.2 mmol) in acetonitrile were heated at 110 °C for 3 h. The pure **3c** was obtained as a greenish solid (0.322 g, 64% yield) after chromatography on silica gel ( $CH_2Cl_2/MeOH = 6/1$ , v/v). mp >250 °C.  $^1H$  NMR (400 MHz,  $DMSO-d_6$ ):  $\delta$  10.64 (s, 2H), 8.75 (s, 2H), 8.43 (s, 2H), 7.75 (d,  $J = 8.4$  Hz, 4H), 6.88 (d,  $J = 8.8$  Hz, 4H), 3.00 (s, 12H).  $^{13}C$  NMR (100 MHz,  $DMSO-d_6$ ):  $\delta$  165.8, 160.0, 151.3, 133.9, 123.4, 123.3, 122.7, 119.5, 112.3, 40.1. HRMS-ESI  $[M-Cl]^+$  calcd for  $C_{25}H_{26}N_9O$ , 468.2255; found, 468.2252. Elemental analysis calcd (%) for  $C_{25}H_{26}ClN_9O$ : C, 59.58; H, 5.20; N, 25.01. Found: C, 59.64; H, 5.11; N, 24.95.

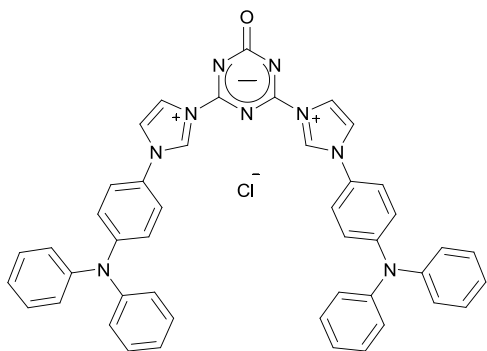

**2-Oxo-4,6-bis[1-[4-(diphenylamino)phenyl]-1*H*-imidazol-3-ium-3-yl]-2*H*-1,3,5-triazin-5-ide chloride (3d)**

Cyanuric chloride (0.184 g, 1.0 mmol) and 4-(1*H*-imidazol-1-yl)-*N,N*-diphenylaniline **2d** (0.684 g, 2.2 mmol) in acetonitrile were heated at 110 °C for 2.5 h. The pure **3d** was obtained as a yellow solid (0.466 g, 62% yield) after chromatography on silica gel ( $CH_2Cl_2/MeOH = 10/1$ , v/v). mp >250 °C.  $^1H$  NMR (400 MHz,  $CDCl_3$ ):  $\delta$  12.23 (s, 2H), 8.60 (s, 2H), 7.90 (d,  $J = 8.8$  Hz, 4H), 7.64 (s, 2H),

7.32-7.28 (m, 8H), 7.17-7.11 (m, 16H).  $^{13}\text{C}$  NMR (100 MHz,  $\text{CDCl}_3$ ):  $\delta$  167.2, 160.3, 150.2, 146.6, 135.8, 129.9, 126.9, 125.9, 124.8, 122.8, 121.9, 120.6, 119.9. HRMS-ESI  $[\text{M}-\text{Cl}]^+$  calcd for  $\text{C}_{45}\text{H}_{34}\text{N}_9\text{O}$ , 716.2881; found, 716.2881. Elemental analysis calcd (%) for  $\text{C}_{45}\text{H}_{34}\text{ClN}_9\text{O}$   $0.5\text{CH}_2\text{Cl}_2$   $0.8\text{CH}_3\text{CN}$ : C, 68.36; H, 4.56; N, 16.59. Found: C, 68.50; H, 4.72; N, 16.53.

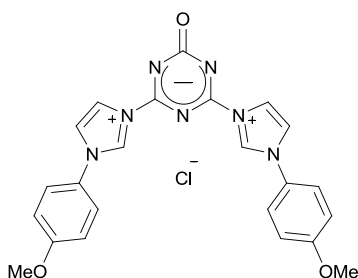

**2-Oxo-4,6-bis[1-(4-methoxyphenyl)-1H-imidazol-3-ium-3-yl]-2H-1,3,5-triazin-5-ide chloride (3e)**

Cyanuric chloride (0.184 g, 1.0 mmol) and 1-(4-methoxyphenyl)-1H-imidazole **2e** (0.383 g, 2.2 mmol) in acetonitrile were heated at 110 °C for 2.5 h. The pure **3e** was obtained as a white solid (0.329 g, 69% yield) after chromatography on silica gel ( $\text{CH}_2\text{Cl}_2/\text{MeOH}$  = 10/1, v/v). mp >250 °C.  $^1\text{H}$  NMR (400 MHz,  $\text{DMSO}-d_6$ ):  $\delta$  10.71 (s, 2 H), 8.79 (s, 2 H), 8.48 (s, 2 H), 7.90 (d,  $J$  = 8.4 Hz, 4 H), 7.22 (d,  $J$  = 8.8 Hz, 4H), 3.87 (s, 6H).  $^{13}\text{C}$  NMR (100 MHz,  $\text{DMSO}-d_6$ ):  $\delta$  166.0, 160.5, 159.8, 134.8, 127.7, 124.3, 122.9, 119.5, 115.1, 55.9. HRMS-ESI  $[\text{M}-\text{Cl}]^+$  calcd for  $\text{C}_{23}\text{H}_{20}\text{N}_7\text{O}_3$ , 442.1622; found, 442.1624. Elemental analysis calcd (%) for  $\text{C}_{23}\text{H}_{20}\text{ClN}_7\text{O}_3$ : C, 57.80; H, 4.22; N, 20.52. Found: C, 57.64; H, 4.29; N, 20.62.

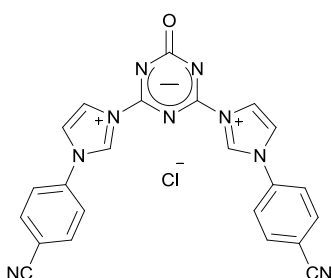

**2-Oxo-4,6-bis[1-(4-cyanophenyl)-1H-imidazol-3-ium-3-yl]-2H-1,3,5-triazin-5-ide chloride (3f)**

Cyanuric chloride (0.184 g, 1.0 mmol) and 4-(1H-imidazol-1-yl)-benzonitrile **2f** (0.372 g, 2.2 mmol) in acetonitrile were heated at 110 °C for 3.5 h. The pure **3f** was obtained as a brown solid (0.350 g, 75% yield) after a few washes with acetonitrile. mp >250 °C.  $^1\text{H}$  NMR (400 MHz,  $\text{DMSO}-d_6$ ):  $\delta$  11.04 (s, 2H), 8.90 (s, 2H), 8.67 (s, 2H), 8.30-8.23 (m, 8H).  $^{13}\text{C}$  NMR (100 MHz,  $\text{DMSO}-d_6$ ):  $\delta$

163.2, 150.1, 138.7, 135.5, 134.5, 133.6, 123.2, 122.6, 120.3, 113.7. HRMS-ESI  $[M-Cl]^+$  calcd for  $C_{23}H_{14}N_9O$ , 432.1316; found, 432.1317. Elemental analysis calcd (%) for  $C_{23}H_{14}ClN_9O \cdot 0.9CH_3OH \cdot CH_2Cl_2$ : C, 51.42; H, 3.40; N, 21.67. Found: C, 51.13; H, 3.45; N, 21.55.

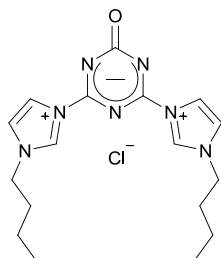

### 2-Oxo-4,6-bis[1-*n*-butyl-1*H*-imidazol-3-ium-3-yl]-2*H*-1,3,5-triazin-5-ide chloride (**3g**)

Cyanuric chloride (0.184 g, 1.0 mmol) and 1-butyl-1*H*-imidazole **2g** (0.273 g, 2.2 mmol) in acetonitrile were reacted at 0 °C for 20 min. The pure **3g** was obtained as a white solid (0.196 g, 52% yield).  $^1H$  NMR (400 MHz, DMSO- $d_6$ ):  $\delta$  10.39 (s, 2 H), 8.56 (s, 2 H), 8.05 (s, 2 H), 4.30 (t,  $J$  = 7.0 Hz, 4 H), 1.92-1.85 (m, 4 H), 1.34-1.28 (m, 4H), 0.93 (t,  $J$  = 7.2 Hz, 6H).  $^{13}C$  NMR (100 MHz, DMSO- $d_6$ ):  $\delta$  165.7, 159.8, 136.5, 123.4, 119.0, 49.3, 31.0, 18.8, 13.3. HRMS-ESI  $[M-Cl]^+$  calcd for  $C_{17}H_{24}N_7O$ , 342.2037; found, 342.2035. Elemental analysis calcd (%) for  $C_{17}H_{24}ClN_7O \cdot 0.8CH_2Cl_2$ : C, 47.95; H, 5.79; N, 21.99. Found: C: 48.21; H: 5.89; N: 21.76.

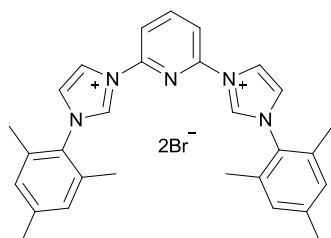

### 2,6-Bis(1-mesityl-1*H*-imidazol-3-ium-3-yl)pyridine dibromide<sup>2</sup> (**3b'**)

A sealed glass tube immersed in an oil bath containing a mixture of 2,6-dibromopyridine (0.50 g, 2.1 mmol) and 1-mesityl-1*H*-imidazole (1.08 g, 5.8 mmol) was heated at 150 °C for 3 days. After cooling to room temperature, the black residue was triturated with Et<sub>2</sub>O and filtered. The resulting black solid was dissolved in a minimum amount of methanol and reprecipitated by adding Et<sub>2</sub>O. The precipitate was collected by filtration and dried in vacuo to afford **3b'** as a brown solid (0.89 g, 70% yield).  $^1H$  NMR (DMSO- $d_6$ ):  $\delta$  10.78 (s, 2H), 9.25 (s, 2H), 8.70 (t,  $J$  = 8.0 Hz, 1H), 8.48 (d,  $J$  = 8.0 Hz, 2H), 8.32 (s, 2H), 7.21 (s, 4H), 2.36 (s, 6H), 2.15 (s, 12H).

#### IV. Crystal Growth and X-ray Crystallographic Data of **3a** (PF<sub>6</sub><sup>-</sup>)·CH<sub>3</sub>OH and **4**·(CH<sub>3</sub>)<sub>2</sub>CO

Compound **3a** (PF<sub>6</sub><sup>-</sup>) was easily obtained from **3a** through anion exchange with NH<sub>4</sub>PF<sub>6</sub>, and the single crystal was obtained by slow diffusion of MeOH/CH<sub>2</sub>Cl<sub>2</sub> at ambient temperature for several days. The single crystal **4** was grown in acetone/EtOH/H<sub>2</sub>O in the same way.

**Table S1** Summary of Crystal Data for **3a**(PF<sub>6</sub><sup>-</sup>)·CH<sub>3</sub>OH and **4**·(CH<sub>3</sub>)<sub>2</sub>CO

|                                                     | <b>3a</b> (PF <sub>6</sub> <sup>-</sup> )                                      | <b>4</b>                                                        |
|-----------------------------------------------------|--------------------------------------------------------------------------------|-----------------------------------------------------------------|
| Empirical formula                                   | C <sub>22</sub> H <sub>20</sub> F <sub>6</sub> N <sub>7</sub> O <sub>2</sub> P | C <sub>13</sub> H <sub>19</sub> N <sub>5</sub> O <sub>3</sub>   |
| Formula weight                                      | 559.42                                                                         | 293.33                                                          |
| Temperature/K                                       | 100(2)                                                                         | 293.15                                                          |
| Crystal system                                      | orthorhombic                                                                   | triclinic                                                       |
| Space group                                         | P n m a                                                                        | P-1                                                             |
| <i>a</i> /Å                                         | 18.2455(3)                                                                     | 8.0418(5)                                                       |
| <i>b</i> /Å                                         | 15.6917(2)                                                                     | 9.8200(6)                                                       |
| <i>c</i> /Å                                         | 8.0286(10)                                                                     | 10.9614(8)                                                      |
| <i>α</i> /°                                         | 90.000                                                                         | 89.012(5)                                                       |
| <i>β</i> /°                                         | 90.000                                                                         | 77.986(6)                                                       |
| <i>γ</i> /°                                         | 90.000                                                                         | 65.983(6)                                                       |
| Volume/Å <sup>3</sup>                               | 2298.61(6)                                                                     | 771.15(9)                                                       |
| <i>Z</i>                                            | 4                                                                              | 2                                                               |
| Calculated density (mg/mm <sup>3</sup> )            | 1.617                                                                          | 1.263                                                           |
| <i>m</i> /mm <sup>-1</sup>                          | 0.207                                                                          | 0.093                                                           |
| <i>F</i> (000)                                      | 1144                                                                           | 312.0                                                           |
| Crystal size/mm <sup>3</sup>                        | 0.58 × 0.38 × 0.20                                                             | 0.29 × 0.23 × 0.20                                              |
| 2 $\theta$ range for data collection                | 2.58 to 29.27°                                                                 | 6.1 to 49.98°                                                   |
| Index ranges                                        | -24 ≤ <i>h</i> ≤ 23, -19 ≤ <i>k</i> ≤ 21, -11 ≤ <i>l</i> ≤ 10                  | -9 ≤ <i>h</i> ≤ 9, -11 ≤ <i>k</i> ≤ 11, -12 ≤ <i>l</i> ≤ 13     |
| Reflections collected                               | 18885                                                                          | 5798                                                            |
| Independent reflections                             | 2998 [ <i>R</i> (int) = 0.0256]                                                | 2722 [ <i>R</i> (int) = 0.0185]                                 |
| Data/restraints/parameters                          | 2998 / 0 / 194                                                                 | 2722/0/193                                                      |
| Goodness-of-fit on <i>F</i> <sup>2</sup>            | 1.170                                                                          | 1.068                                                           |
| Final <i>R</i> indexes [ <i>I</i> ≥ 2σ( <i>I</i> )] | <i>R</i> <sub>1</sub> = 0.0312, <i>wR</i> <sub>2</sub> = 0.0861                | <i>R</i> <sub>1</sub> = 0.0644, <i>wR</i> <sub>2</sub> = 0.1793 |
| Final <i>R</i> indexes [all data]                   | <i>R</i> <sub>1</sub> = 0.0415, <i>wR</i> <sub>2</sub> = 0.0882                | <i>R</i> <sub>1</sub> = 0.0849, <i>wR</i> <sub>2</sub> = 0.1972 |
| Largest diff. peak/hole (e Å <sup>-3</sup> )        | 0.255/-0.369                                                                   | 0.61/-0.31                                                      |
| CCDC No.                                            | 898254                                                                         | 898255                                                          |



## V. Synthesis and Characterization of the Pd(L<sub>3a</sub>)Cl Complex

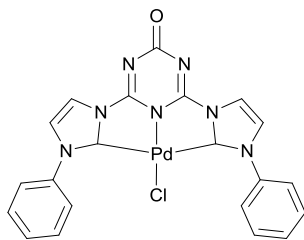

### 2-Oxo-4,6-bis(1-phenyl-1H-imidazol-2-ylidene-3-yl)-2H-1,3,5-triazin-5-ide chloropalladium (Pd(L<sub>3a</sub>)Cl)

A mixture of the ligand **3a** (0.42 g, 1.0 mmol), <sup>t</sup>BuONa (0.24 g, 2.4 mmol), and Pd(OAc)<sub>2</sub> (0.27 g, 1.2 mmol) in dry THF (8 mL) were allowed to react in a flame-dried Schlenk test tube at room temperature under N<sub>2</sub> atmosphere for 5 h. After reaction, the volatiles were removed under reduced pressure. The residue was then dispersed in 50 mL CH<sub>2</sub>Cl<sub>2</sub> and filtered. The organic phase was concentrated and passed through a silica gel column (CH<sub>2</sub>Cl<sub>2</sub>/MeOH = 10/1, v/v) to afford the complex as a white solid (0.24 g, 46% yield). mp >250 °C. <sup>1</sup>H NMR (400 MHz, DMSO): δ 8.51 (br, 2H), 7.46-7.42 (m, 6H), 7.36-7.30 (m, 6H). <sup>13</sup>C NMR (100 MHz, DMSO): δ 170.0, 161.4, 129.9, 129.4, 128.8, 126.3, 123.5, 122.6, 119.1. HRMS (ESI-TOF) (CH<sub>3</sub>OH): m/z: 524.0211 [Pd(L<sub>3a</sub>)Cl+H]<sup>+</sup>, 542.0385 [Pd(L<sub>3a</sub>)Cl+H<sub>2</sub>O+H]<sup>+</sup>, 556.0380 [Pd(L<sub>3a</sub>)+CH<sub>3</sub>OH+H]<sup>+</sup>, 560.0439 [Pd(L<sub>3a</sub>)Cl+2H<sub>2</sub>O+H]<sup>+</sup>. Elemental analysis calcd (%) for C<sub>21</sub>H<sub>16</sub>ClN<sub>7</sub>OPd 0.8CH<sub>2</sub>Cl<sub>2</sub>: C, 44.21; H, 3.00; N, 16.56. Found: C, 44.48; H, 3.22; N, 16.84.

## VI. General Procedure for the Suzuki–Miyaura Coupling Reaction

A mixture of a bromoarene (1.0 mmol), an arylboronic acid (1.1 mmol), Pd(OAc)<sub>2</sub> (0.10 mL, 5.0×10<sup>-5</sup> mmol), a ligand (0.10 mL, 5.0×10<sup>-5</sup> mmol) and a base (0.424 g, 2.0 mmol) in a solvent (1 mL) were allowed to react in a sealed tube at 100 °C for 7 h. After reaction, the volatiles were removed under reduced pressure. The residue was then dispersed in 20 mL CH<sub>2</sub>Cl<sub>2</sub> and filtered. The organic phase was concentrated and passed through a silica gel column to afford the desired coupling product.

## VII. Optimization of the Suzuki–Miyaura Coupling Reaction

**Table S2** Optimization of the Suzuki–Miyaura coupling reaction.<sup>a</sup>

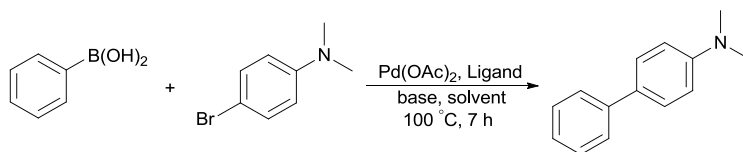

| Entry | Solvent               | Base                           | Ligand     | Yield <sup>b</sup> (%) |
|-------|-----------------------|--------------------------------|------------|------------------------|
| 1     | 1,4-dioxane           | K <sub>3</sub> PO <sub>4</sub> | <b>3a</b>  | 12                     |
| 2     | DMF                   | K <sub>3</sub> PO <sub>4</sub> | <b>3a</b>  | 18                     |
| 3     | H <sub>2</sub> O      | K <sub>3</sub> PO <sub>4</sub> | <b>3a</b>  | 39                     |
| 4     | MeOH                  | K <sub>3</sub> PO <sub>4</sub> | <b>3a</b>  | 64                     |
| 5     | MeOH/H <sub>2</sub> O | K <sub>3</sub> PO <sub>4</sub> | <b>3a</b>  | 67                     |
| 6     | MeOH/H <sub>2</sub> O | K <sub>2</sub> CO <sub>3</sub> | <b>3a</b>  | 56                     |
| 7     | MeOH/H <sub>2</sub> O | NaOAc                          | <b>3a</b>  | 12                     |
| 8     | MeOH/H <sub>2</sub> O | Et <sub>3</sub> N              | <b>3a</b>  | 25                     |
| 9     | MeOH/H <sub>2</sub> O | K <sub>3</sub> PO <sub>4</sub> | <b>3b</b>  | 77                     |
| 10    | MeOH/H <sub>2</sub> O | K <sub>3</sub> PO <sub>4</sub> | <b>3c</b>  | 94                     |
| 11    | MeOH/H <sub>2</sub> O | K <sub>3</sub> PO <sub>4</sub> | <b>3d</b>  | 75                     |
| 12    | MeOH/H <sub>2</sub> O | K <sub>3</sub> PO <sub>4</sub> | <b>3e</b>  | 83                     |
| 13    | MeOH/H <sub>2</sub> O | K <sub>3</sub> PO <sub>4</sub> | <b>3f</b>  | 30                     |
| 14    | MeOH/H <sub>2</sub> O | K <sub>3</sub> PO <sub>4</sub> | <b>3b'</b> | 56                     |
| 15    | MeOH/H <sub>2</sub> O | K <sub>3</sub> PO <sub>4</sub> | None       | 63                     |

<sup>a</sup> Reaction conditions: 4-bromo-*N,N*-dimethylaniline (1.0 mmol), phenylboronic acid (1.1 mmol), Pd(OAc)<sub>2</sub> (0.005 mol%), ligand (0.005 mol%), base (2.0 mmol), solvent (1 mL) at 100 °C for 7 h. <sup>b</sup> Isolated yield.

## VIII. Analytical Data of the Coupling Products

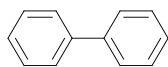

### Biphenyl

White solid (0.151 g, 98% yield). <sup>1</sup>H NMR (400 MHz, CDCl<sub>3</sub>): δ 7.59 (d, *J* = 7.2 Hz, 4H), 7.43 (t, *J* = 7.6 Hz, 4H), 7.33 (t, *J* = 7.2 Hz, 2H).

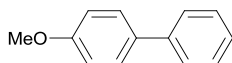

### 4-Methoxybiphenyl

White solid (0.173 g, 94% yield). <sup>1</sup>H NMR (400 MHz, CDCl<sub>3</sub>): δ 7.57-7.53 (m, 4H), 7.45-7.41 (m, 2H), 7.33-7.29 (m, 1H), 6.98 (d, *J* = 8.4 Hz, 2H), 3.86 (s, 3H).

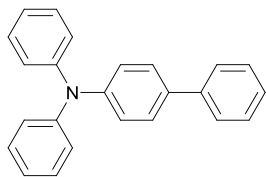

### ***N,N*-Diphenylbiphenyl-4-amine**

White solid (0.308 g, 96% yield).  $^1\text{H}$  NMR (400 MHz,  $\text{CDCl}_3$ ):  $\delta$  7.55 (d,  $J = 7.6$  Hz, 2H), 7.48 (d,  $J = 8.4$  Hz, 2H), 7.39 (t,  $J = 7.6$  Hz, 2H), 7.32-7.24 (m, 5H), 7.12 (d,  $J = 8.0$  Hz, 6H), 7.00 (t,  $J = 7.6$  Hz, 2H).

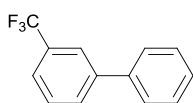

### **3-(Trifluoromethyl)biphenyl**

Yellow oil (0.198 g, 89% yield).  $^1\text{H}$  NMR (400 MHz,  $\text{CDCl}_3$ ):  $\delta$  7.85 (s, 1H), 7.77 (d,  $J = 7.6$  Hz, 1H), 7.62-7.54 (m, 4H), 7.47 (t,  $J = 7.4$  Hz, 2H), 7.39 (t,  $J = 7.2$  Hz, 1H).

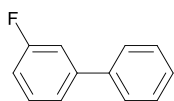

### **3-Fluorobiphenyl**

Colorless oil (0.156 g, 91% yield).  $^1\text{H}$  NMR (400 MHz,  $\text{CDCl}_3$ ):  $\delta$  7.59-7.57 (m, 2H), 7.47-7.36 (m, 5H), 7.31-7.28 (m, 1H), 7.06-7.02 (m, 1H).

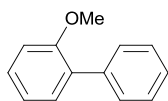

### **2-Methoxybiphenyl**

Colorless oil (0.164 g, 89% yield).  $^1\text{H}$  NMR (400 MHz,  $\text{CDCl}_3$ ):  $\delta$  7.53 (d,  $J = 7.6$  Hz, 2H), 7.40 (t,  $J = 7.6$  Hz, 2H), 7.35-7.32 (m, 3H), 7.06-6.99 (m, 2H), 3.89 (s, 3H).

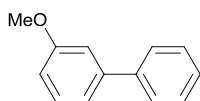

### **3-Methoxybiphenyl**

Yellow oil (0.178 g, 97% yield).  $^1\text{H}$  NMR (400 MHz,  $\text{CDCl}_3$ ):  $\delta$  7.61 (d,  $J = 7.6$  Hz, 2H), 7.44 (t,  $J =$

7.6 Hz, 2H), 7.40-7.36 (m, 2H), 7.20 (d,  $J = 8.0$  Hz, 1H), 7.16 (s, 1H), 6.92 (d,  $J = 8.0$  Hz, 1H), 3.89 (s, 3H).

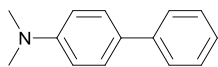

### ***N,N*-Dimethylbiphenyl-4-amine**

White solid (0.185 g, 94% yield).  $^1\text{H}$  NMR (400 MHz,  $\text{CDCl}_3$ ):  $\delta$  7.58 (d,  $J = 7.6$  Hz, 2H), 7.53 (d,  $J = 8.0$  Hz, 2H), 7.41 (t,  $J = 7.6$  Hz, 2H), 7.30-7.27 (m, 1H), 6.84 (d,  $J = 8.4$  Hz, 2H), 3.02 (s, 6H).

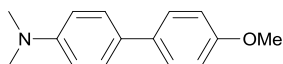

### **4'-Methoxy-*N,N*-dimethylbiphenyl-4-amine**

Yellow solid (0.213 g, 94% yield).  $^1\text{H}$  NMR (400 MHz,  $\text{CDCl}_3$ ):  $\delta$  7.49-7.46 (m, 4H), 6.94 (d,  $J = 8.4$  Hz, 2H), 6.85 (d,  $J = 7.6$  Hz, 2H), 3.84 (s, 3H), 2.99 (s, 6H).

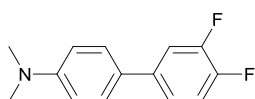

### **3',4'-Difluoro-*N,N*-dimethylbiphenyl-4-amine**

White solid (0.214 g, 92% yield).  $^1\text{H}$  NMR (400 MHz,  $\text{CDCl}_3$ ):  $\delta$  7.41 (d,  $J = 8.4$  Hz, 2H), 7.35-7.30 (m, 1H), 7.25-7.23 (m, 1H), 7.19-7.13 (m, 1H), 6.78 (d,  $J = 8.4$  Hz, 2H), 3.00 (s, 6H).

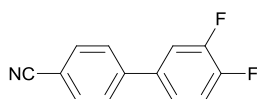

### **3',4'-Difluorobiphenyl-4-carbonitrile**

White solid (0.206 g, 96% yield).  $^1\text{H}$  NMR (400 MHz,  $\text{CDCl}_3$ ):  $\delta$  7.73 (d,  $J = 8.0$  Hz, 2H), 7.61 (d,  $J = 8.4$  Hz, 2H), 7.42-7.37 (m, 1H), 7.30-7.24 (m, 2H).

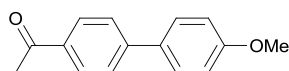

### **1-(4'-Methoxybiphenyl-4-yl)ethanone**

White solid (0.221 g, 98% yield).  $^1\text{H}$  NMR (400 MHz,  $\text{CDCl}_3$ ):  $\delta$  8.00 (d,  $J = 8.0$  Hz, 2H), 7.64 (d,  $J = 8.0$  Hz, 2H), 7.57 (d,  $J = 8.4$  Hz, 2H), 6.99 (d,  $J = 8.4$  Hz, 2H), 3.86 (s, 3H), 2.63 (s, 3H).

## IX. References

- (1) (a) L. Zhu, P. Guo, G. Li, J. Lan, R. Xie and J. You, *J. Org. Chem.*, 2007, **72**, 8535; (b) A. J. Arduengo, F. P. Gentry, P. K. Taverkere, H. E. Simmons, **US 6177575**, 2001; (c) J.-Y. Cheng and Y.-H. Chu, *Tetrahedron Lett.*, 2006, **47**, 1575.
- (2) D. Serra, P. Cao, J. Cabrera, R. Padilla, F. Rominger and M. Limbach, *Organometallics*, 2011, **30**, 1885.

## X. Copies of $^1\text{H}$ NMR and $^{13}\text{C}$ NMR Spectra

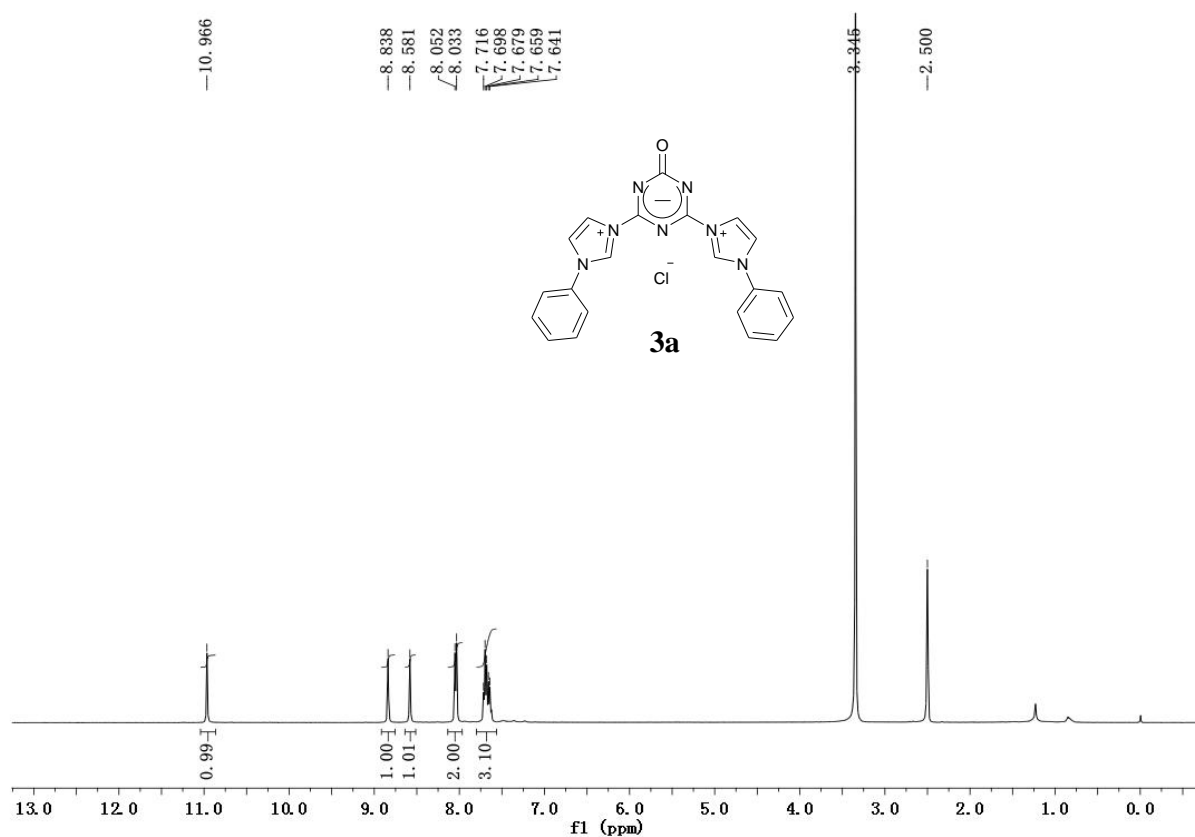

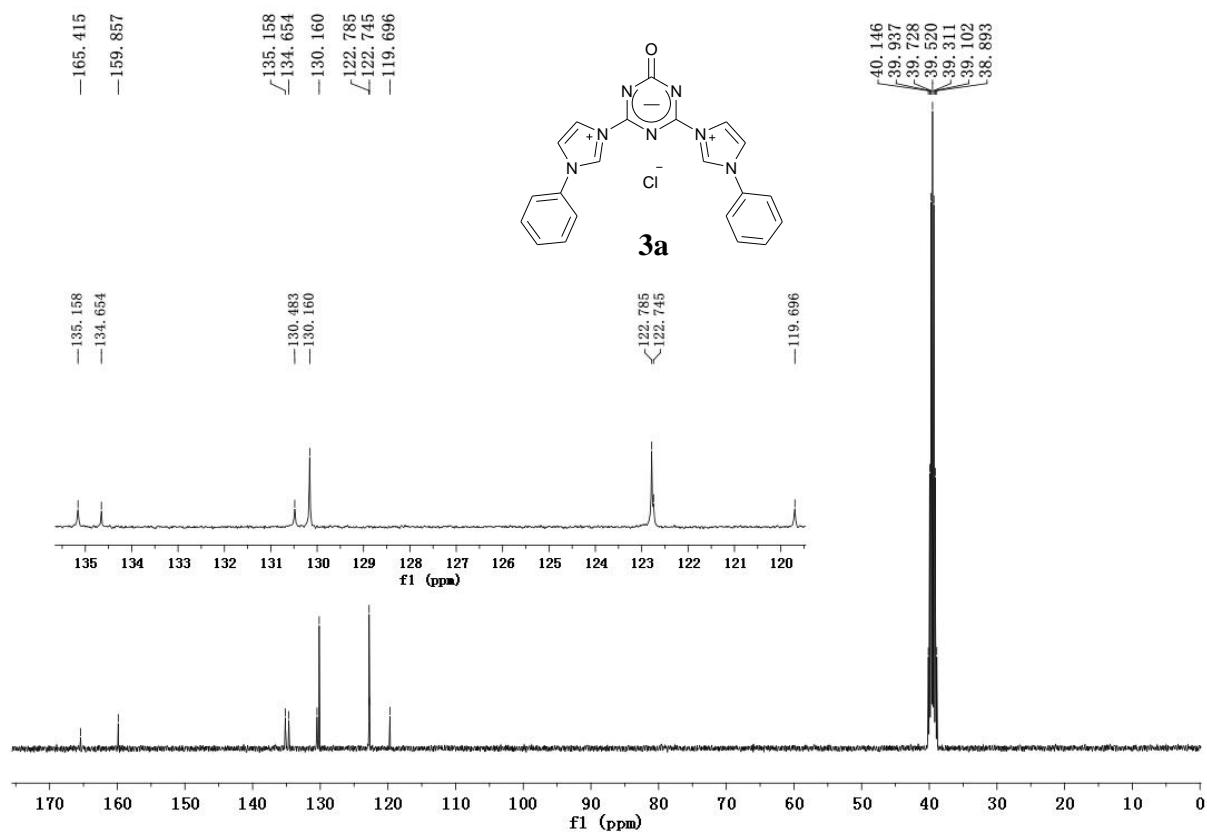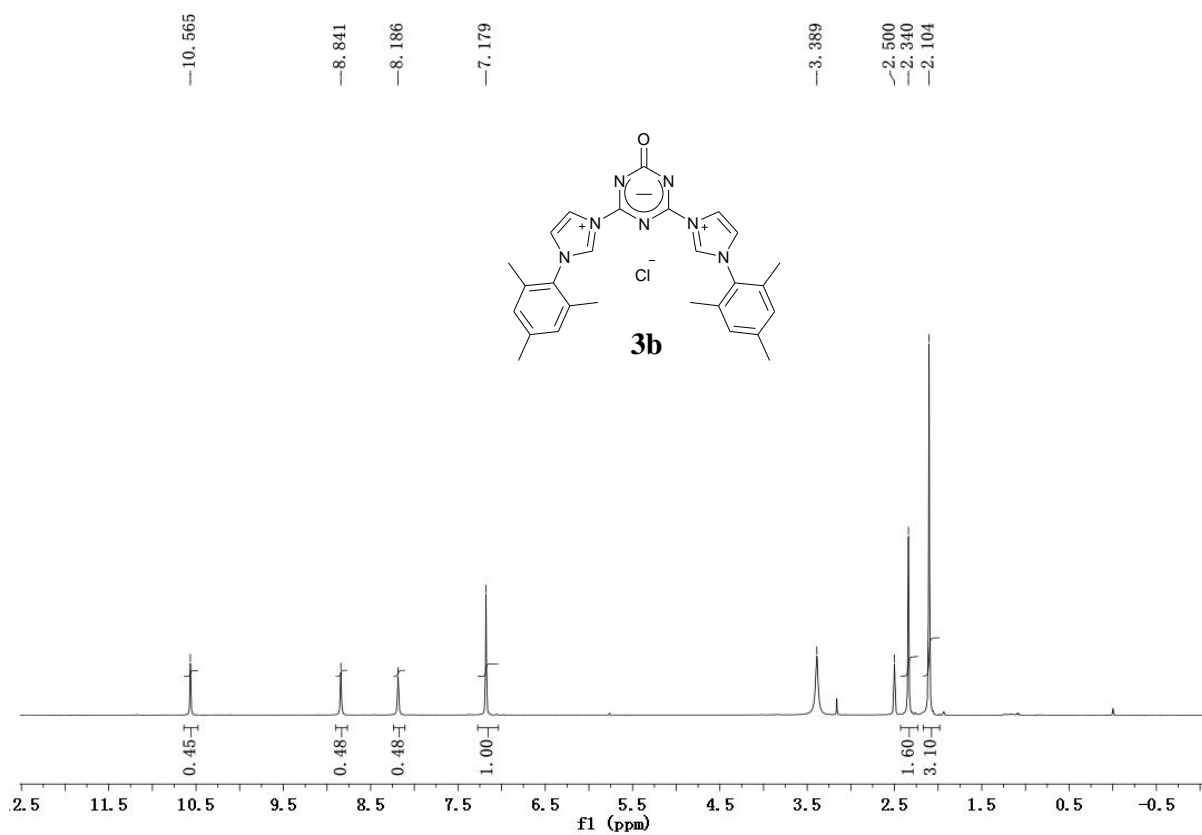

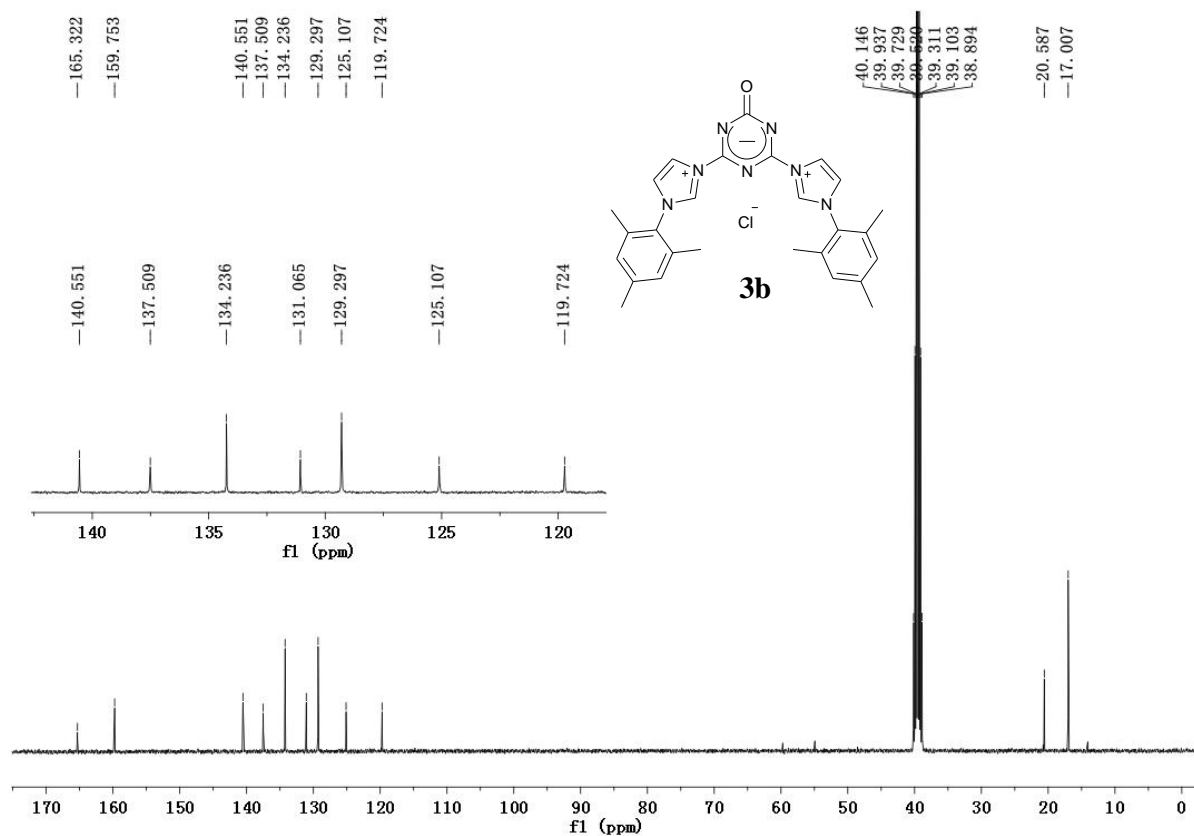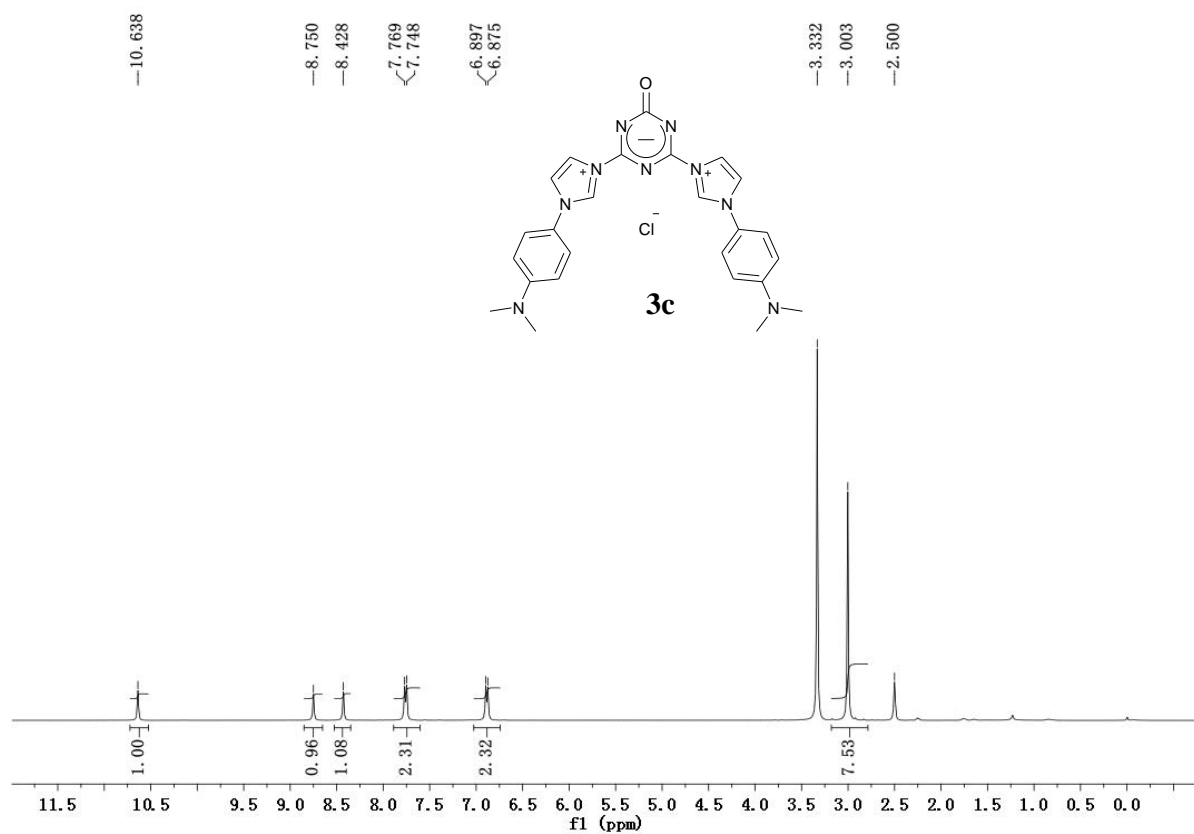

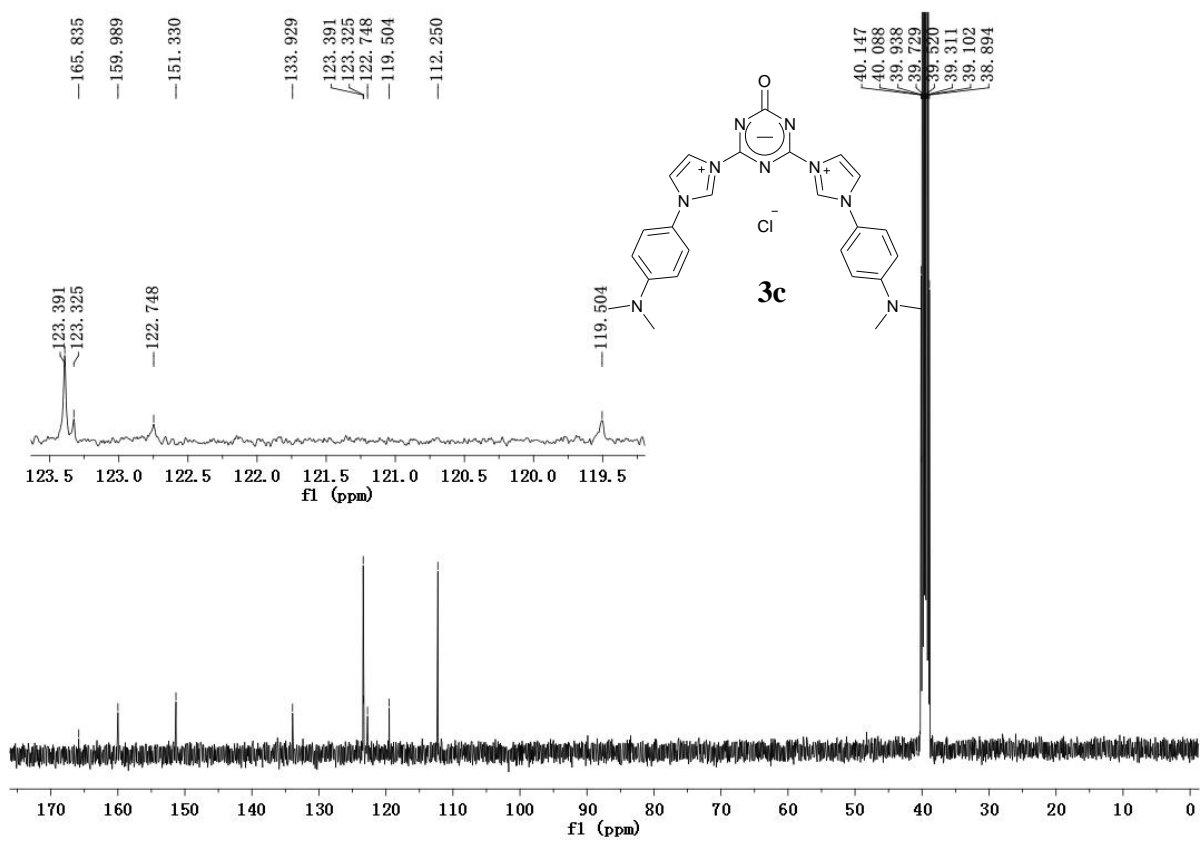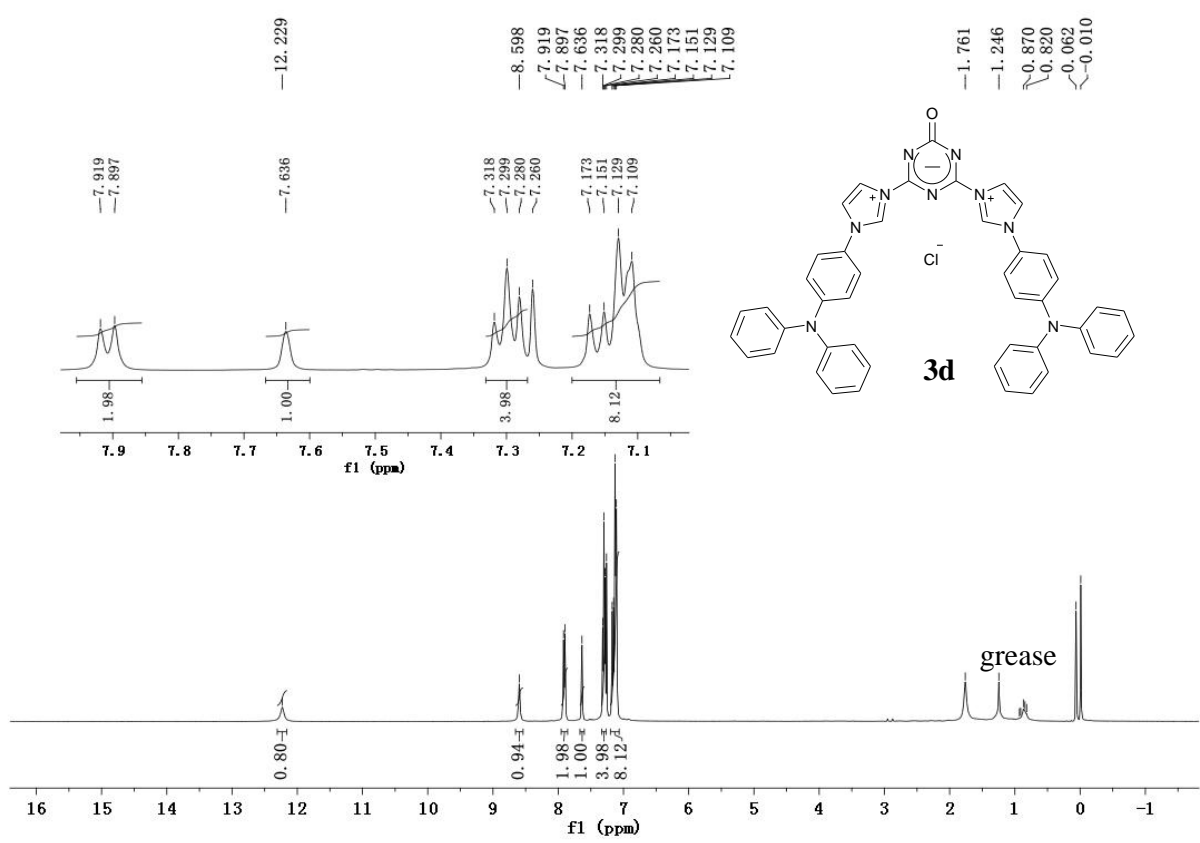



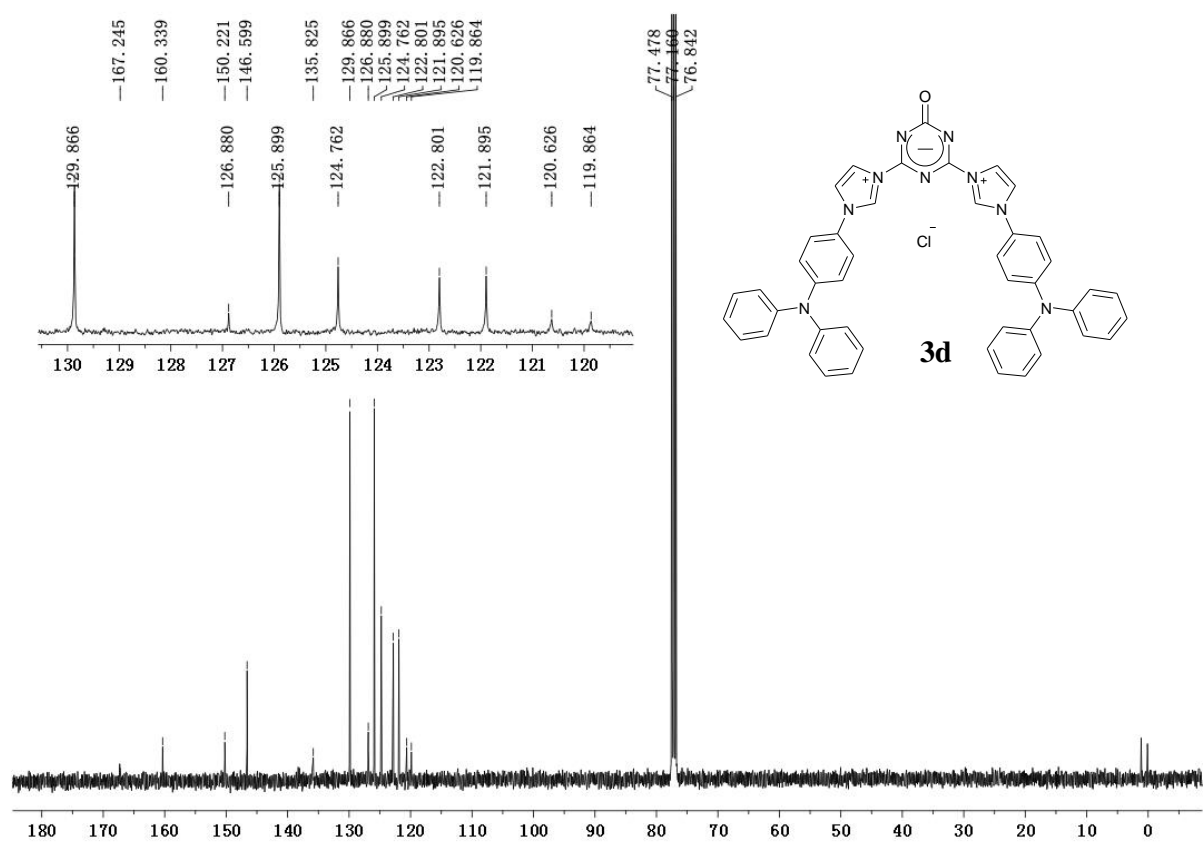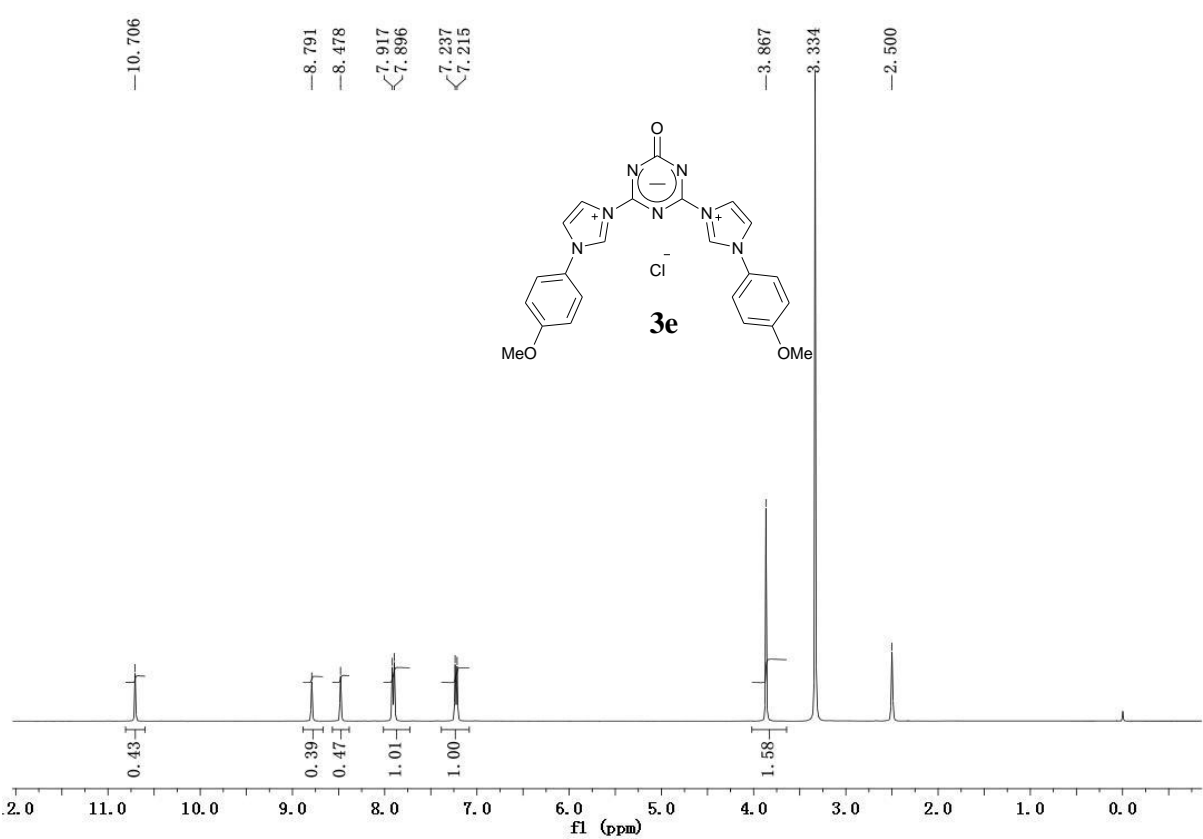

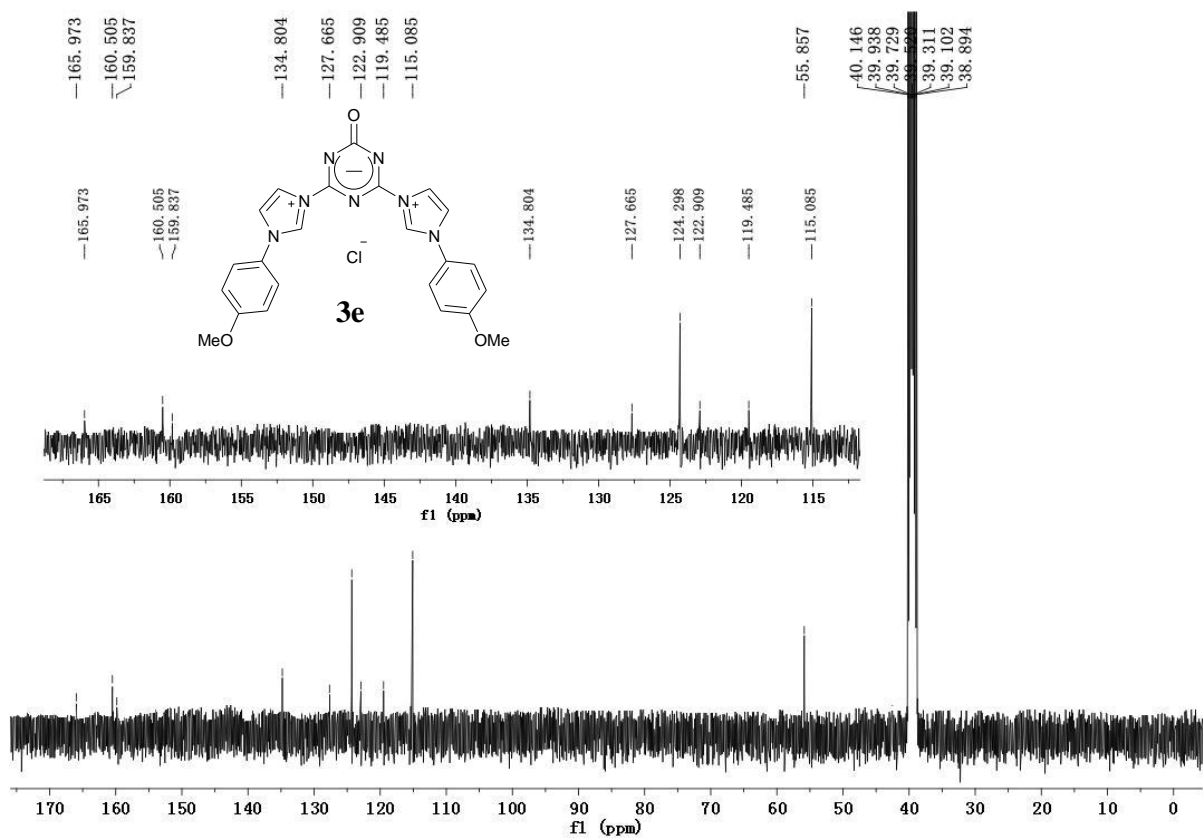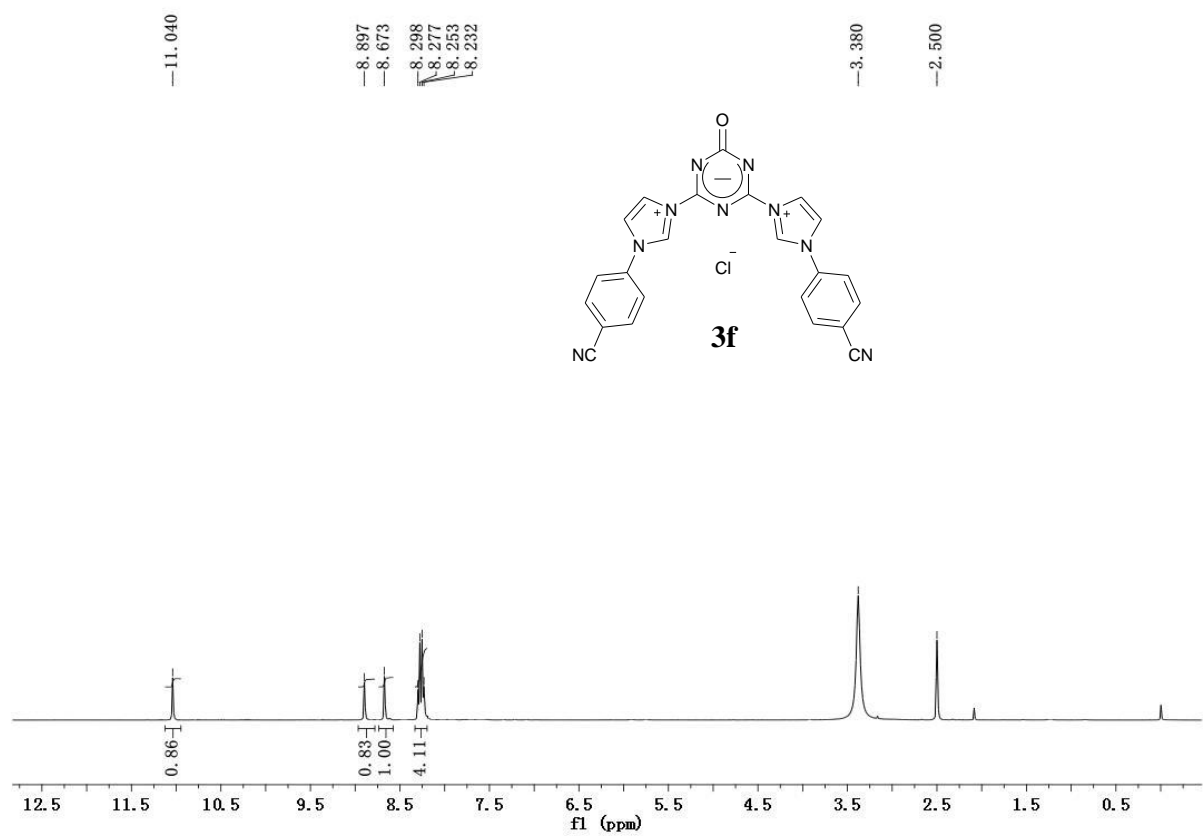

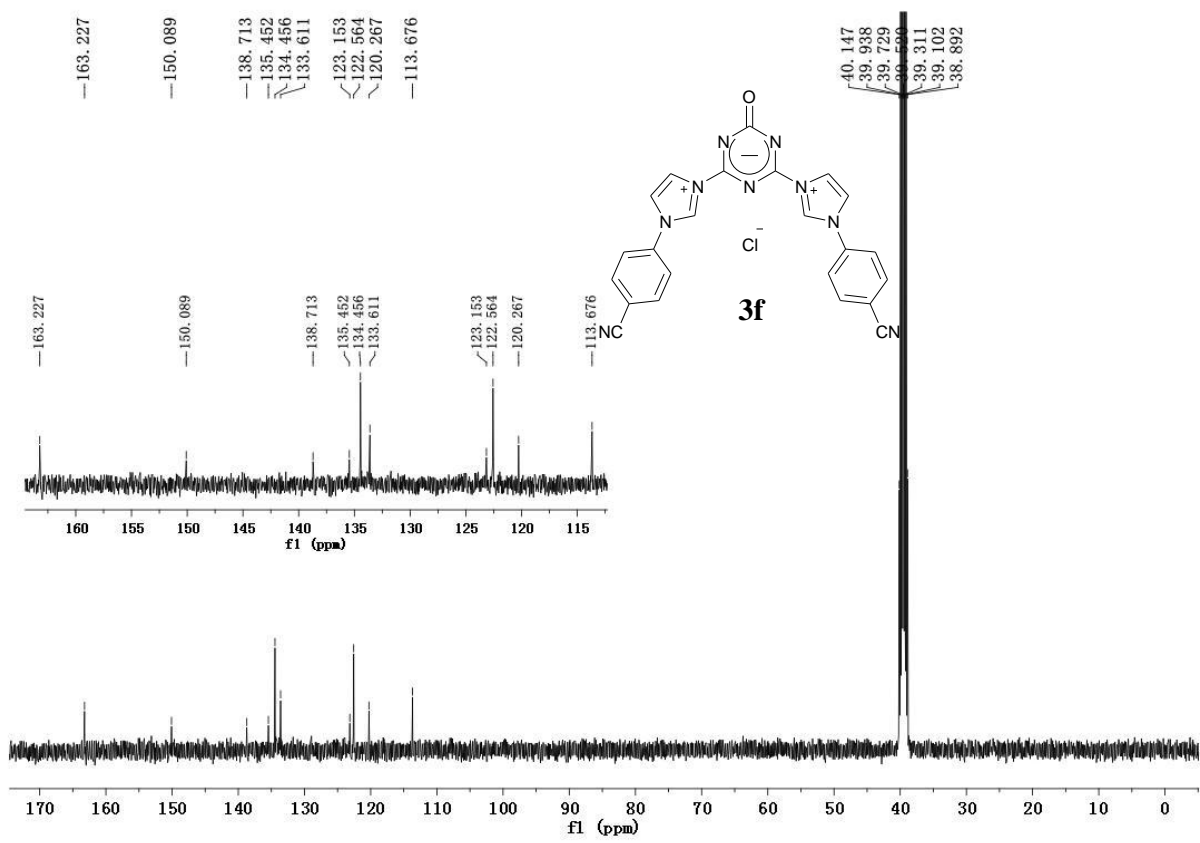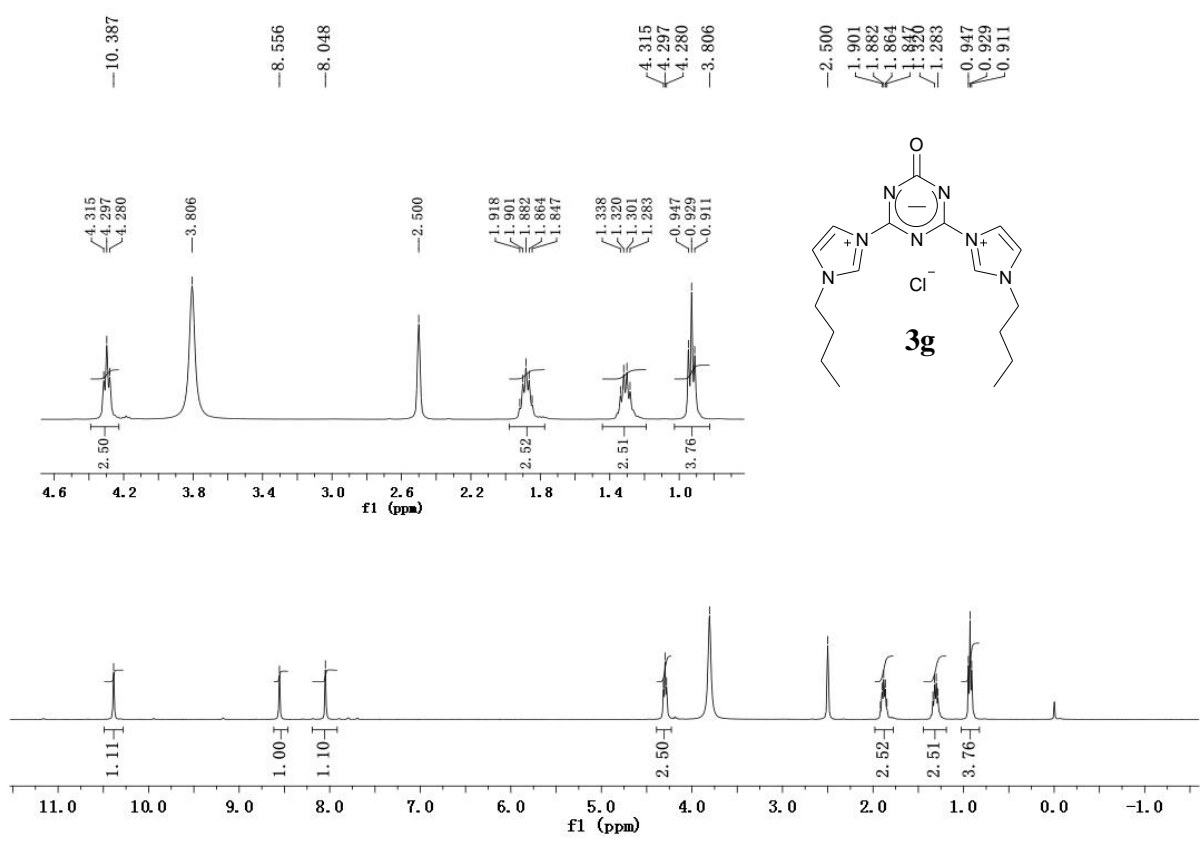

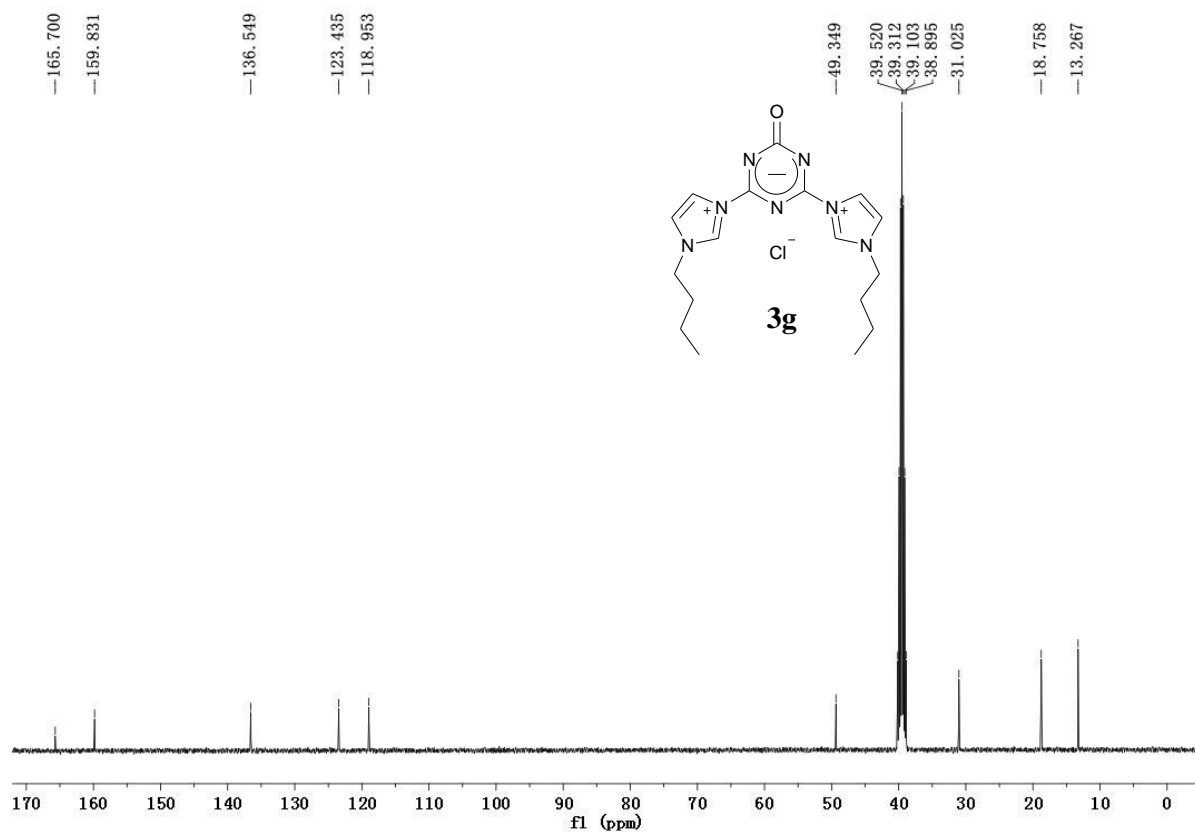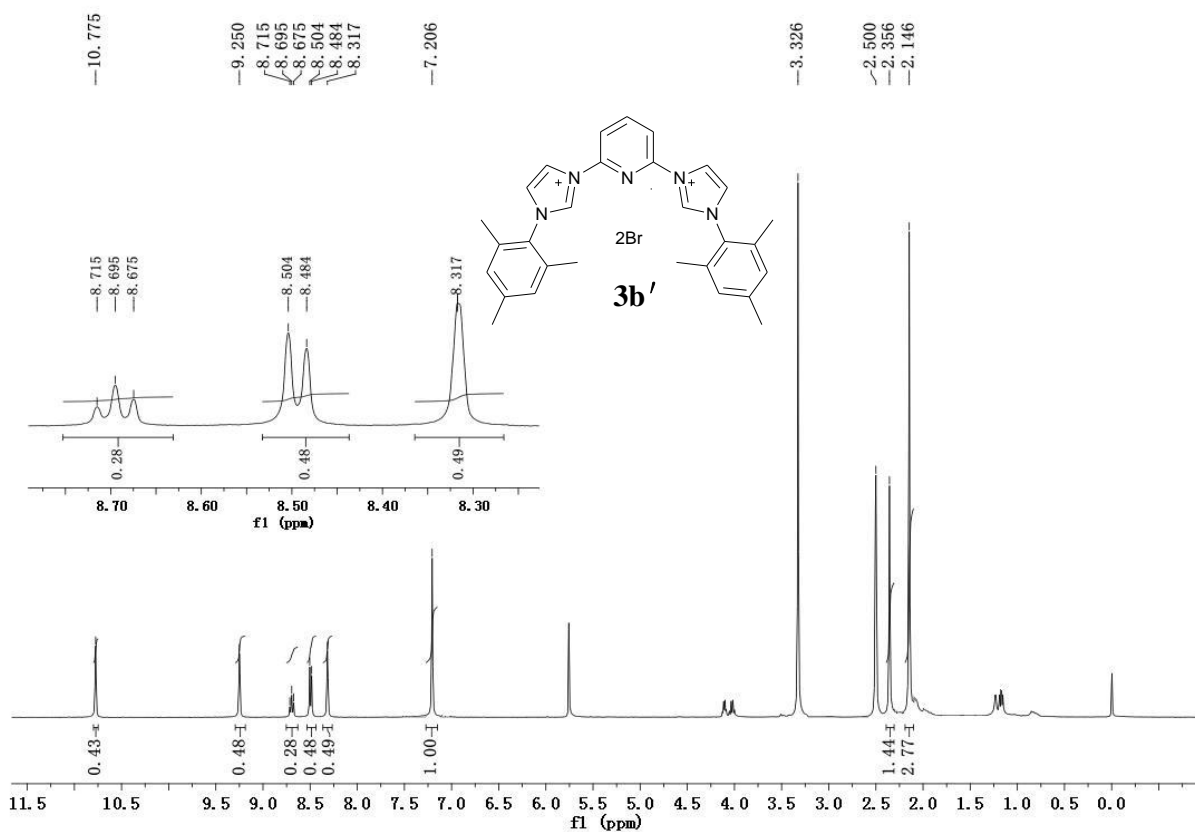

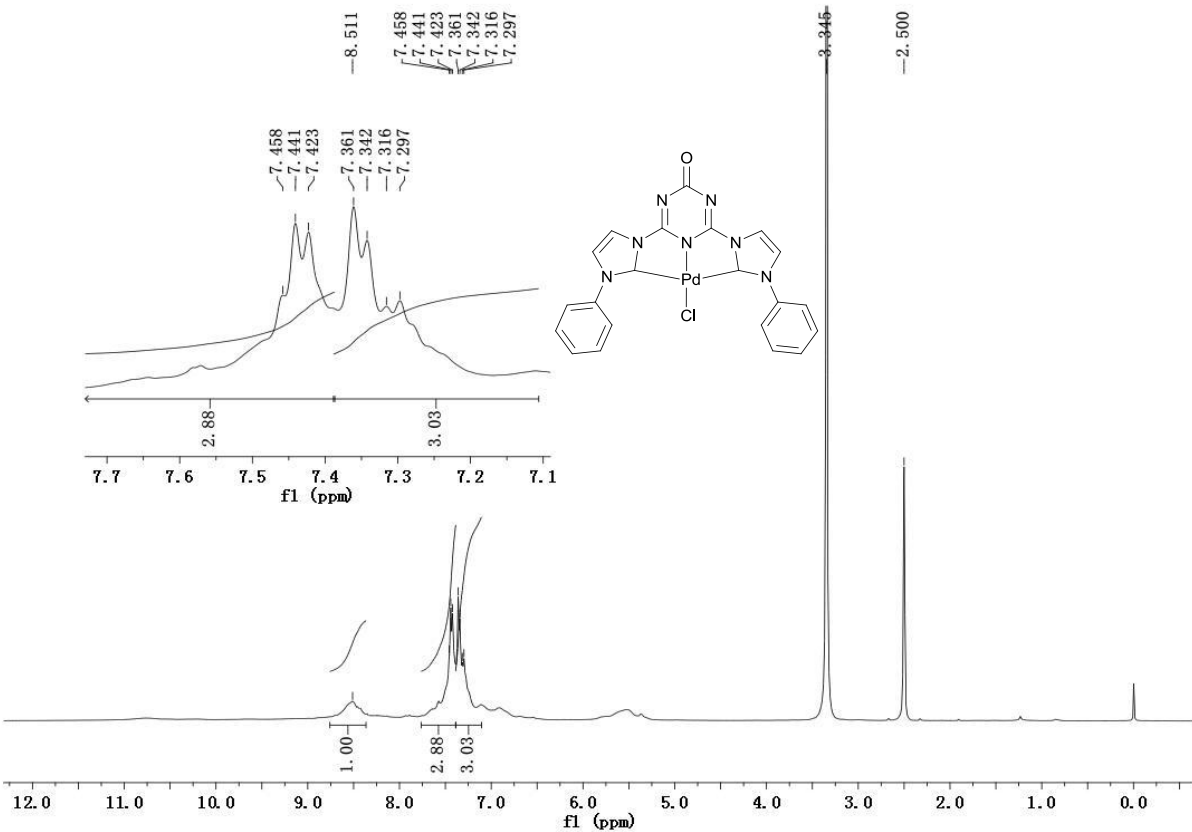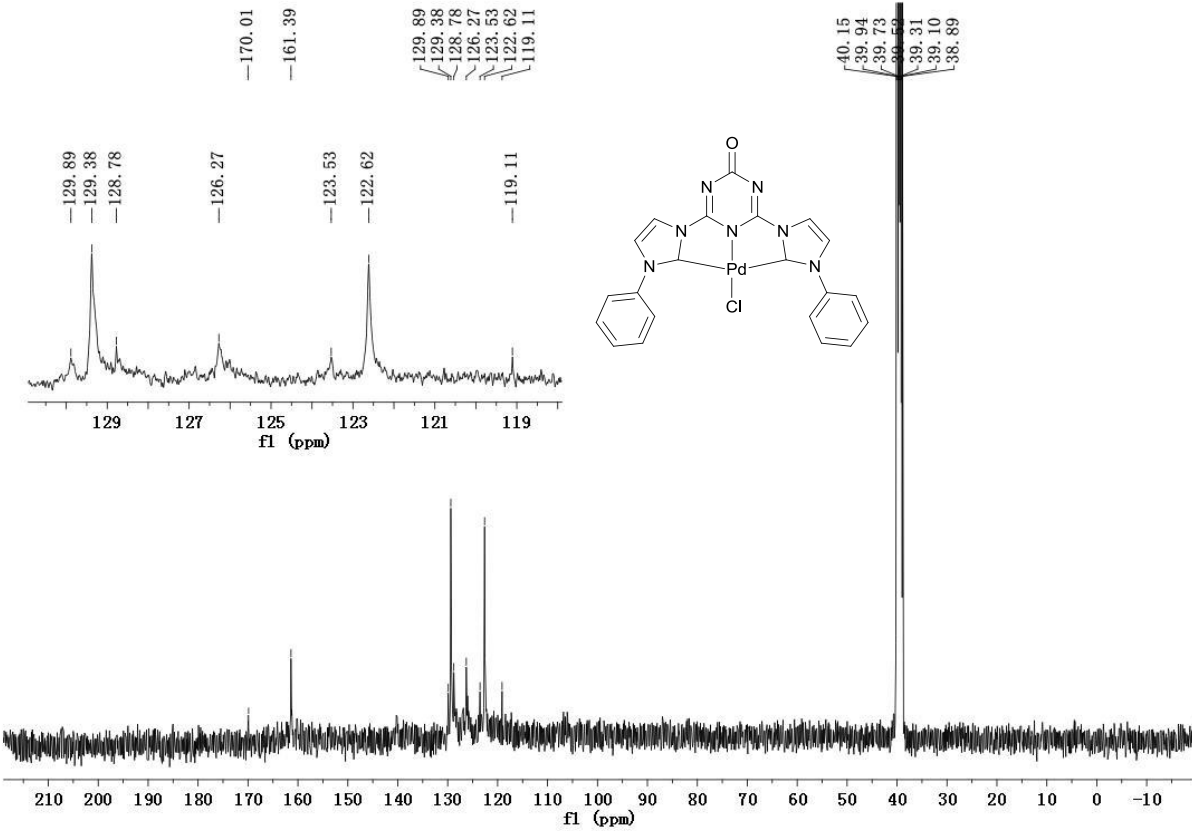

Supplement: c2cc36375e.pdf [file c2cc36375e.pdf]
